# Supplementary material for: Thermodynamics of Ag(I) Complex Formations with 2-Mercaptoimidazole in Water−Dimethyl Sulfoxide Solvents
Source: MDPI journal article supplement (doi:10.3390/inorganics11050199), 2023-05-03
Supplement: s1 [file s1]

## Supplementary

**Table S1.** pH-metric titration data of 2-mercaptoimidazole and calculated pKa valued of 2-mercaptoimidazole in the H<sub>2</sub>O-DMSO solvent at  $\chi_{\text{DMSO}} = 0.1$  mol. fraction,  $C_{\text{2MI}} = 0.01 \text{ mol L}^{-1}$ .

| V (0.01N,<br>HCl), ml | pH   | [HL] <sup>+</sup> · 10 <sup>4</sup> ,<br>mol L <sup>-1</sup> | [L] · 10 <sup>3</sup> , mol<br>L <sup>-1</sup> | pKa       |
|-----------------------|------|--------------------------------------------------------------|------------------------------------------------|-----------|
| 0                     | 5.82 | 0                                                            | 10                                             |           |
| 0.05                  | 3.58 | 2.00                                                         | 9.98                                           | 1.890     |
| 0.1                   | 3.22 | 3.98                                                         | 9.96                                           | 1.840     |
| 0.15                  | 3.02 | 6.01                                                         | 9.94                                           | 1.825     |
| 0.2                   | 2.88 | 7.90                                                         | 9.92                                           | 1.819     |
| 0.25                  | 2.78 | 9.90                                                         | 9.90                                           | 1.826     |
| 0.3                   | 2.7  | 11.86                                                        | 9.88                                           | 1.835     |
| 0.35                  | 2.63 | 13.81                                                        | 9.86                                           | 1.842     |
| 0.4                   | 2.56 | 15.75                                                        | 9.84                                           | 1.840     |
| 0.45                  | 2.51 | 17.67                                                        | 9.82                                           | 1.851     |
| 0.5                   | 2.47 | 19.64                                                        | 9.80                                           | 1.868     |
| 0.55                  | 2.43 | 21.53                                                        | 9.78                                           | 1.880     |
| 0.6                   | 2.39 | 23.40                                                        | 9.77                                           | 1.889     |
| 0.65                  | 2.35 | 25.33                                                        | 9.75                                           | 1.896     |
| 0.7                   | 2.32 | 27.24                                                        | 9.73                                           | 1.910     |
| 0.75                  | 2.29 | 29.13                                                        | 9.71                                           | 1.922     |
| 0.8                   | 2.26 | 31.01                                                        | 9.69                                           | 1.933     |
| 0.85                  | 2.23 | 32.88                                                        | 9.67                                           | 1.942     |
| 0.9                   | 2.21 | 34.75                                                        | 9.65                                           | 1.960     |
| 0.95                  | 2.19 | 36.61                                                        | 9.63                                           | 1.977     |
| 1.0                   | 2.17 | 38.46                                                        | 9.62                                           | 1.994     |
| 1.05                  | 2.15 | 40.31                                                        | 9.60                                           | 2.010     |
| 1.1                   | 2.13 | 42.15                                                        | 9.58                                           | 2.025     |
| 1.15                  | 2.11 | 43.98                                                        | 9.56                                           | 2.040     |
| 1.2                   | 2.09 | 45.80                                                        | 9.54                                           | 2.055     |
| 1.25                  | 2.07 | 47.62                                                        | 9.52                                           | 2.070     |
| 1.3                   | 2.06 | 49.43                                                        | 9.51                                           | 2.095     |
| 1.35                  | 2.05 | 51.23                                                        | 9.49                                           | 2.120     |
|                       |      |                                                              |                                                | 1.93±0.06 |

**Table S2.** Potentiometric titration data of AgNO<sub>3</sub> solution by 2MI solution at  $T=298.15\text{K}$ ,  $\chi_{\text{DMSO}}=0.10$  mol. fraction.  $I=0.1\text{ mol L}^{-1}\text{ NaClO}_4$ .

| $E, \text{mV}$ | $C_{\text{Ag}} \cdot 10^5$<br>mol L <sup>-1</sup> | $C_{\text{L}} \cdot 10^5$<br>mol L <sup>-1</sup> | $[\text{Ag}] \cdot 10^{10}$<br>mol L <sup>-1</sup> | $[\text{L}] \cdot 10^{10}$<br>mol L <sup>-1</sup> | $\text{AgL}^+ \cdot 10^5$<br>mol L <sup>-1</sup> | $\text{AgL}_2^+ \cdot 10^7$<br>mol L <sup>-1</sup> | $\text{AgL}_3^+ \cdot 10^9$<br>mol L <sup>-1</sup> |
|----------------|---------------------------------------------------|--------------------------------------------------|----------------------------------------------------|---------------------------------------------------|--------------------------------------------------|----------------------------------------------------|----------------------------------------------------|
| 514,4          | 0,200                                             | 9,980                                            | 798040,13                                          | 0,0003874                                         | 1,999                                            | 0,00139                                            | 0,000000100                                        |
| 483,3          | 0,398                                             | 9,960                                            | 598110,18                                          | 0,0010286                                         | 3,979                                            | 0,00732                                            | 0,000001401                                        |
| 427,1          | 0,596                                             | 9,940                                            | 398255,94                                          | 0,0023128                                         | 5,957                                            | 0,0247                                             | 0,0000106                                          |
| 399,4          | 0,794                                             | 9,921                                            | 198704,84                                          | 0,0061722                                         | 7,932                                            | 0,0876                                             | 0,0001006                                          |
| 389,5          | 0,990                                             | 9,901                                            | 13304,52                                           | 0,113                                             | 9,747                                            | 1,9760                                             | 0,0416                                             |
| 379,3          | 1,186                                             | 9,881                                            | 855,582                                            | 1,730                                             | 9,574                                            | 2,965                                              | 0,954                                              |
| 364,8          | 1,381                                             | 9,862                                            | 425,531                                            | 3,376                                             | 9,291                                            | 5,613                                              | 3,525                                              |
| 358,5          | 1,575                                             | 9,843                                            | 276,903                                            | 5,035                                             | 9,017                                            | 8,125                                              | 7,610                                              |
| 350,8          | 1,768                                             | 9,823                                            | 198,991                                            | 6,792                                             | 8,742                                            | 10627                                              | 13,427                                             |
| 344,2          | 1,961                                             | 9,804                                            | 154,930                                            | 8,473                                             | 8,491                                            | 12,875                                             | 20,294                                             |
| 339,3          | 2,153                                             | 9,785                                            | 125,502                                            | 10,164                                            | 8,250                                            | 15,006                                             | 28,370                                             |
| 334,0          | 2,344                                             | 9,766                                            | 104,730                                            | 11,853                                            | 8,028                                            | 17,030                                             | 37,548                                             |
| 328,5          | 2,534                                             | 9,747                                            | 89,011                                             | 13,561                                            | 7,807                                            | 18,951                                             | 47,790                                             |
| 323,0          | 2,724                                             | 9,728                                            | 76,861                                             | 15,277                                            | 7,594                                            | 20,762                                             | 58,997                                             |
| 318,6          | 2,913                                             | 9,709                                            | 67,211                                             | 17,000                                            | 7,390                                            | 22,483                                             | 71,097                                             |
| 315,7          | 3,101                                             | 9,690                                            | 59,380                                             | 18,731                                            | 7,194                                            | 24,111                                             | 84,021                                             |
| 308,9          | 3,475                                             | 9,653                                            | 47,760                                             | 22,123                                            | 6,833                                            | 27,051                                             | 111,322                                            |
| 304,3          | 3,846                                             | 9,615                                            | 39,221                                             | 25,617                                            | 6,499                                            | 29,792                                             | 141,963                                            |
| 298,2          | 4,398                                             | 9,560                                            | 30,412                                             | 30,735                                            | 6,045                                            | 33,251                                             | 190,087                                            |
| 292,3          | 4,943                                             | 9,506                                            | 24,413                                             | 35,790                                            | 5,650                                            | 36,192                                             | 240,916                                            |
| 286,3          | 5,482                                             | 9,452                                            | 19,981                                             | 40,912                                            | 5,286                                            | 38,701                                             | 294,498                                            |
| 281,7          | 6,015                                             | 9,398                                            | 16,700                                             | 45,967                                            | 4,966                                            | 40,850                                             | 349,278                                            |
| 276,6          | 6,542                                             | 9,346                                            | 14,181                                             | 50,993                                            | 4,677                                            | 42,680                                             | 404,841                                            |
| 273,1          | 7,063                                             | 9,294                                            | 12,182                                             | 56,002                                            | 4,410                                            | 44,200                                             | 460,393                                            |
| 267,6          | 7,749                                             | 9,225                                            | 10,133                                             | 62,597                                            | 4,101                                            | 45,941                                             | 534,923                                            |
| 262,8          | 8,425                                             | 9,158                                            | 8,554                                              | 69,143                                            | 3,822                                            | 47,290                                             | 608,284                                            |
| 258,4          | 9,091                                             | 9,091                                            | 7,312                                              | 75,622                                            | 3,574                                            | 48,362                                             | 680,290                                            |
| 254,3          | 9,910                                             | 9,009                                            | 6,113                                              | 83,612                                            | 3,302                                            | 49,403                                             | 768,336                                            |
| 249,0          | 10,873                                            | 8,913                                            | 5,014                                              | 93,061                                            | 3,017                                            | 50,241                                             | 869,650                                            |
| 243,7          | 11,817                                            | 8,818                                            | 4,192                                              | 102,333                                           | 2,774                                            | 50,790                                             | 966,885                                            |
| 239,6          | 12,740                                            | 8,726                                            | 3,551                                              | 111,442                                           | 2,562                                            | 51,090                                             | 1059,105                                           |
| 234,3          | 13,793                                            | 8,621                                            | 2,980                                              | 121,877                                           | 2,345                                            | 51,154                                             | 1159,635                                           |
| 232,0          | 14,821                                            | 8,518                                            | 2,533                                              | 132,077                                           | 2,160                                            | 51,061                                             | 1254,344                                           |
| 228,3          | 15,966                                            | 8,403                                            | 2,134                                              | 143,485                                           | 1,975                                            | 50,712                                             | 1353,570                                           |
| 223,0          | 14,219                                            | 8,278                                            | 1,780                                              | 155,968                                           | 1,800                                            | 50,233                                             | 1457,297                                           |
| 217,8          | 18,434                                            | 8,157                                            | 1,521                                              | 168,117                                           | 1,649                                            | 49,604                                             | 1551,146                                           |
| 213,8          | 19,614                                            | 8,039                                            | 1,304                                              | 179,943                                           | 1,518                                            | 48,870                                             | 1635,696                                           |
| 210,4          | 20,886                                            | 7,911                                            | 1,111                                              | 192,712                                           | 1,391                                            | 47,991                                             | 1720,120                                           |

|       |        |       |        |         |       |        |          |
|-------|--------|-------|--------|---------|-------|--------|----------|
| 206,5 | 22,118 | 7,788 | 0,967  | 205,090 | 1,283 | 47,100 | 1796,812 |
| 202,0 | 23,896 | 7,610 | 0,794  | 222,995 | 1,145 | 45,702 | 1895,434 |
| 198,6 | 25,595 | 7,440 | 0,664  | 240,125 | 1,031 | 44,301 | 1978,822 |
| 193,6 | 27,746 | 7,225 | 0,536  | 261,833 | 0,907 | 42,521 | 2070,813 |
| 189,0 | 29,775 | 7,022 | 0,441  | 282,379 | 0,806 | 40,744 | 2139,888 |
| 184,3 | 31,694 | 6,831 | 0,371  | 301,809 | 0,724 | 39,112 | 2195,407 |
| 180,3 | 34,383 | 6,562 | 0, 294 | 329,084 | 0,625 | 36,810 | 2253,517 |
| 176,0 | 36,869 | 6,313 | 0,239  | 354,326 | 0,548 | 34,730 | 2289,124 |
